# Supplementary material for: Genetic architecture of host proteins involved in SARS-CoV-2 infection
Source: PubMed Central journal article supplement (PMC7744536; doi:10.1038/s41467-020-19996-z), 2020-12-16
Supplement: 41467_2020_19996_MOESM3_ESM.pdf [file 41467_2020_19996_MOESM3_ESM.pdf]

## **Description of Additional Supplementary Files**

### Supplementary Data 1

Summary of SARS-CoV-2 or COVID-19 related proteins.

### Supplementary Data 2

Summary of high-priority SOMAmers, i.e. with at least one cis-pQTL

### Supplementary Data 3

Regional sentinel pQTLs

### Supplementary Data 4

Results from conditional analysis

### Supplementary Data 5

Comparison of effect estimates between SOMAscan and Olink assays

### Supplementary Data 6

Significant results from SOMAmer cis-score analyses in UK Biobank.

### Supplementary Data 7

Look-up of 220 cis-pQTLs and proxies in LD ( $r^2 > 0.8$ ) in various data bases
